# Supplementary material
Source: MDPI journal article supplement (https://www.mdpi.com/1999-4907/14/8/1681)
Supplement: s1 [file s1 › Table S1.xlsx]

## Sheet: Sheet1
Table S1. Comparison of evolutionary rates in rps2 gene clusters among Sciadopitys verticillata, Callitris rhomboidea and other species.
Gene name		trst	trsv	ratio	dN	dS	ω
rps2	76	0.022	0.006	0.135	0.049	0.015	0.188
	Sciadopitys verticillata	0.391	0.139	0.355	0.565	0.404	0.714
	Callitris rhomboidea	0.296	0.106	0.357	0.233	0.365	1.568
	P	0.043	0.042	0.139	0.053	0.045	0.052
atpI	76	0.016	0.002	0.097	0.038	0.009	0.136
	Sciadopitys verticillata	0.092	0.036	0.385	0.395	0.048	0.121
	Callitris rhomboidea	0.12	0.039	0.323	0.374	0.085	0.227
	P	0.055	0.022	0.101	0.041	0.036	0.331
atpH	76	0.011	0.001	0.016	0.04	0	0
	Sciadopitys verticillata	0.134	0.019	0.14	0.661	0	0
	Callitris rhomboidea	0.106	0.008	0.078	0.467	0	0
	P	0.018	0	0	0.022	1	1
atpF	76	0.022	0.005	0.156	0.04	0.015	0.214
	Sciadopitys verticillata	0.251	0.057	0.227	0.369	0.215	0.582
	Callitris rhomboidea	0.159	0.05	0.312	0.284	0.145	0.511
	P	0.049	0.034	0.32	0.049	0.043	0.173
atpA	76	0.017	0.003	0.188	0.045	0.007	0.137
	Sciadopitys verticillata	0.13	0.049	0.375	0.422	0.102	0.242
	Callitris rhomboidea	0.12	0.027	0.223	0.387	0.06	0.155
	P	0.071	0.042	0.247	0.06	0.053	0.453
Note: P is Kruskal-Wallis rank sum test. Black body is P < 0.05.
