# Supplementary material
Source: MDPI journal article supplement (https://www.mdpi.com/1999-4907/14/8/1681)
Supplement: s1 [file s1 › Table S2.xlsx]

## Sheet: Sheet1
Table S2. Comparison of evolutionary rates in other genes between Sciadopitys verticillata and other species.
Gene name		trst	trsv	ratio	dN	dS	ω
atpE	1	0.024	0.005	0.085	0.013	0.058	0.086
	2	0.318	0.104	0.327	0.344	0.498	0.69
	2÷1	13.137	20.075	3.834	27.474	8.602	8.062
	P	0.026	0.026	0.205	0.026	0.051	0.051
cemA	1	0.033	0.008	0.146	0.027	0.054	0.309
	2	0.267	0.108	0.404	0.267	0.566	0.471
	2÷1	7.98	12.788	2.77	9.728	10.418	1.525
	P	0.026	0.051	0.359	0.051	0.051	0.359
petA	1	0.019	0.004	0.136	0.01	0.047	0.196
	2	0.112	0.054	0.479	0.1	0.335	0.299
	2÷1	5.764	13.484	3.532	9.761	7.16	1.527
	P	0.077	0.026	0.154	0.026	0.051	0.308
petN	1	0.015	0.002	0	0.003	0.057	0.002
	2	0.17	0	0	0	0.758	0
	2÷1	11.331	0	nan	0	13.363	0
	P	0.026	0.923	1	0.949	0.026	1
psaB	1	0.015	0.002	0.08	0.003	0.045	0.08
	2	0.102	0.017	0.164	0.024	0.37	0.065
	2÷1	6.947	9.743	2.041	7.321	8.194	0.811
	P	0.077	0.026	0.41	0.026	0.051	0.641
psaI	1	0.029	0.005	0.104	0.025	0.042	0.095
	2	0.251	0	0.504	0.264	0.407	0.649
	2÷1	8.563	0	4.844	10.409	9.75	6.847
	P	0.026	0.821	0.103	0.026	0.077	0.154
psbA	1	0.014	0.002	0.044	0.003	0.036	0.051
	2	0.071	0.014	0.135	0.008	0.21	0.039
	2÷1	5.191	6.344	3.049	2.951	5.866	0.754
	P	0.103	0.077	0.308	0.256	0.029	0.513
psbD	1	0.013	0.001	0.079	0.002	0.04	0.043
	2	0.118	0.027	0.231	0.017	0.493	0.035
	2÷1	9.083	20.566	2.941	7.787	12.256	0.821
	P	0.051	0.026	0.231	0.077	0.051	0.333
psbE	1	0.013	0.002	0.057	0.004	0.036	0.016
	2	0.085	0.024	0.286	0.034	0.37	0.093
	2÷1	6.364	12.91	5.016	8.4	10.366	5.826
	P	0.077	0.026	0.154	0.077	0.026	0.128
psbK	1	0.026	0.006	0.079	0.021	0.045	0.138
	2	0.133	0.075	0.567	0.137	0.376	0.365
	2÷1	5.059	12.952	7.185	6.63	8.342	2.648
	P	0.103	0.026	0.051	0.026	0.077	0.308
psbL	1	0.015	0.001	0.021	0.004	0.037	0.026
	2	0.079	0.018	0.229	0	0.318	0
	2÷1	5.11	15.447	10.939	0	8.51	0
	P	0.154	0.026	0.103	0.949	0.077	0.974
psbM	1	0.034	0.01	0.094	0.026	0.051	0.106
	2	0.453	0.083	0.183	0.366	0.286	1.278
	2÷1	13.377	8.162	1.936	14.32	5.584	12.072
	P	0.026	0.103	0.256	0.051	0.128	0.051
rbcL	1	0.017	0.004	0.191	0.007	0.052	0.128
	2	0.126	0.01	0.082	0.016	0.395	0.042
	2÷1	7.402	2.363	0.429	2.224	7.662	0.324
	P	0.026	0.231	1	0.333	0.077	0.974
rpl2	1	0.024	0.005	0.113	0.016	0.057	0.148
	2	0.27	0.121	0.035	0.315	0.594	0.53
	2÷1	11.076	24.362	0.309	20.28	10.323	3.588
	P	0.026	0.026	0.923	0.026	0.051	0.154
rpl14	1	0.017	0.003	0.082	0.007	0.051	0.061
	2	0.178	0.063	0.354	0.132	0.692	0.19
	2÷1	10.287	20.83	4.299	18.829	13.568	3.14
	P	0.026	0.026	0.205	0.026	0.026	0.256
rps3	1	0.024	0.007	0.167	0.016	0.056	0.195
	2	0.406	0.137	0.337	0.42	0.447	0.941
	2÷1	16.62	18.783	2.023	27.02	7.93	4.828
	P	0.026	0.026	0.41	0.026	0.051	0.154
rps4	1	0.02	0.007	0.202	0.013	0.048	0.146
	2	0.274	0.05	0.184	0.173	0.426	0.406
	2÷1	13.499	7.419	0.908	13.069	8.94	2.792
	P	0.026	0.077	0.538	0.026	0.051	0.231
rps7	1	0.018	0.004	0.1	0.012	0.037	0.124
	2	0.401	0.173	0.431	0.482	0.662	0.728
	2÷1	22.633	39.654	4.289	40.702	17.754	5.871
	P	0.026	0.026	0.256	0.026	0.026	0.077
rps8	1	0.028	0.006	0.157	0.017	0.065	0.278
	2	0.19	0.053	0.28	0.165	0.353	0.466
	2÷1	6.833	8.53	1.787	9.459	5.436	1.675
	P	0.048	0.051	0.333	0.051	0.077	0.308
rps14	1	0.018	0.005	0.097	0.011	0.038	0.097
	2	0.139	0.086	0.617	0.159	0.384	0.415
	2÷1	7.528	18.114	6.339	14.011	10.18	4.267
	P	0.051	0.026	0.077	0.026	0.051	0.154
rps19	1	0.027	0.007	0.088	0.02	0.054	0.196
	2	0.31	0.07	0.226	0.255	0.57	0.447
	2÷1	11.309	10.402	2.572	12.915	10.533	2.287
	P	0.026	0.077	0.282	0.255	0.26	0.256
ycf2	1	0.039	0.019	0.399	0.039	0.041	0.857
	2	0.805	0.556	0.691	1.018	1.146	0.888
	2÷1	20.746	29.356	1.732	26.141	27.857	1.037
	P	0.026	0.026	0.333	0.026	0.026	0.769
ycf3	1	0.015	0.002	0.081	0.007	0.04	0.14
	2	0.11	0.016	0.146	0.01	0.426	0.022
	2÷1	7.407	7.681	1.79	1.293	10.742	0.16
	P	0.051	0.077	0.385	0.41	0.026	0.667
ycf4	1	0.025	0.005	0.11	0.015	0.057	0.181
	2	0.222	0.045	0.201	0.088	0.691	0.127
	2÷1	8.847	8.588	1.82	6.023	12.194	0.699
	P	0.026	0.077	0.538	0.077	0.026	0.795
Note: 1,other species. 2,Sciadopitys verticillata. Mann-Whitney P < 0.05.
