# Supplementary material
Source: MDPI journal article supplement (https://www.mdpi.com/1999-4907/14/8/1681)
Supplement: s1 [file s1 › Table S3.xlsx]

## Sheet: Sheet1
Table S3. Analysis of selection pressure between Sciadopitys verticillata and other specie.
Gene name	M0	Model2			2 ΔƖ	P
	lnL	lnL	ωSciadopitys verticillata	ωother
atpA	-13257.1	-13253	0.192	0.096	8.098	0.004
atpB	-13141.1	-13141.1	0.092	0.1	0.044	0.835
atpE	-4778.83	-4773.64	0.58	0.188	10.376	0.001
atpF	-6587.06	-6586.15	0.507	0.325	1.801	0.18
atpH	-1392.72	-1392.08	0	0.018	1.285	0.257
atpI	-6561.49	-6561.21	0.105	0.144	0.552	0.458
ccsA	-11749.7	-11749.7	0.277	0.282	0.003	0.957
cemA	-10266.2	-10266.1	0.43	0.388	0.156	0.693
petA	-9349.05	-9347.49	0.254	0.147	3.137	0.077
petB	-4702.68	-4702.01	0.022	0.049	1.352	0.245
petD	-3348.1	-3347.87	0.116	0.076	0.463	0.496
petG	-838.2	-837.067	999	0.088	2.267	0.132
petL	-1119.68	-1119.58	0.463	0.427	0.2	0.655
petN	-594.852	-594.133	0	0.072	1.438	0.231
psaA	-16299.1	-16298.9	0.059	0.074	0.358	0.55
psaB	-15430	-15429.9	0.052	0.055	0.033	0.855
psaC	-1377.5	-1376.89	0.116	0.025	1.229	0.268
psaI	-1482.8	-1482.38	0.77	0.376	0.842	0.359
psaJ	-1522.34	-1522.3	0.198	0.24	0.08	0.777
psbA	-6133.24	-6133.24	0.032	0.033	0.005	0.943
psbB	-10900.7	-10898	0.105	0.051	5.284	0.022
psbC	-9773.7	-9773.11	0.077	0.047	1.186	0.276
psbD	-6053.63	-6053.6	0.029	0.026	0.049	0.825
psbE	-1681.77	-1680.66	0.079	0.073	2.205	0.138
psbF	-727.853	-728.531	0	0.075	1.355	0.244
psbH	-2423.06	-2422.56	0.414	0.245	0.998	0.607
psbI	-866.178	-865.794	0.386	0.104	0.766	0.381
psbJ	-1231.72	-1230.68	0.041	0.165	2.089	0.784
psbK	-2093.27	-2093.3	0.304	0.314	0.075	0.784
psbL	-699.706	-699.01	0	0.117	1.391	0.238
psbM	-1384.89	-1383.49	1.272	0.396	2.807	0.094
psbN	-854.962	-854.391	0	0.097	1.143	0.285
psbT	-881.012	-1633.68	0.279	0.182	1505.34	0
psbZ	-1633.86	-1633.68	0.279	0.182	0.349	0.555
rbcL	-11232.6	-11231.3	0.033	0.066	2.634	0.105
rpl2	-9650.4	-9643.49	0.48	0.196	13.818	0
rpl14	-3366.76	-3366.69	0.16	0.135	0.149	0.7
rpl16	-3807.15	-3807.01	0.206	0.159	0.28	0.597
rpl20	-4816.01	-4813.55	0.835	0.324	4.916	0.027
rpl22	-5537.02	-5536.3	0.56	0.334	1.426	0.232
rpl33	-2356.24	-2355.4	0.517	0.259	1.693	0.193
rpl36	-1038.88	-1038.76	0.284	0.184	0.246	0.62
rpoA	-14519.9	-14519.9	0.34	0.349	0.018	0.893
rpoB	-38327.8	-38321.4	0.437	0.254	12.844	0
rpoC1	-26840.7	-26836.3	0.575	0.32	8.869	0.003
rpoC2	-50279.5	-50278	0.451	0.353	2.941	0.086
rps11	-4979.64	-4976.16	0.77	0.286	6.963	0.008
rps18	-5212.76	-5211.89	0.593	0.319	1.739	0.187
rps19	-3287.22	-3286.29	0.424	0.227	1.87	0.171
rps2	-8508.89	-8502.65	0.658	0.251	12.474	0
rps3	-8487.54	-8480.5	0.723	0.251	14.074	0
rps4	-7421.15	-7420.68	0.335	0.239	0.934	0.334
rps7	-4556.4	-4553.28	0.557	0.258	6.234	0.013
rps8	-4729.69	-4728.56	0.438	0.229	2.256	0.133
rps14	-3131.11	-3130.82	0.325	0.221	0.583	0.445
ycf2	-142689	-142689	0.697	0.758	0.805	0.37
ycf3	-3735.48	-3732.87	0.019	0.125	5.219	0.022
ycf4	-5969.03	-5967.2	0.102	0.205	3.666	0.056
Note：Black front is P < 0.05.
