# Supplementary material
Source: MDPI journal article supplement (https://www.mdpi.com/1999-4907/14/8/1681)

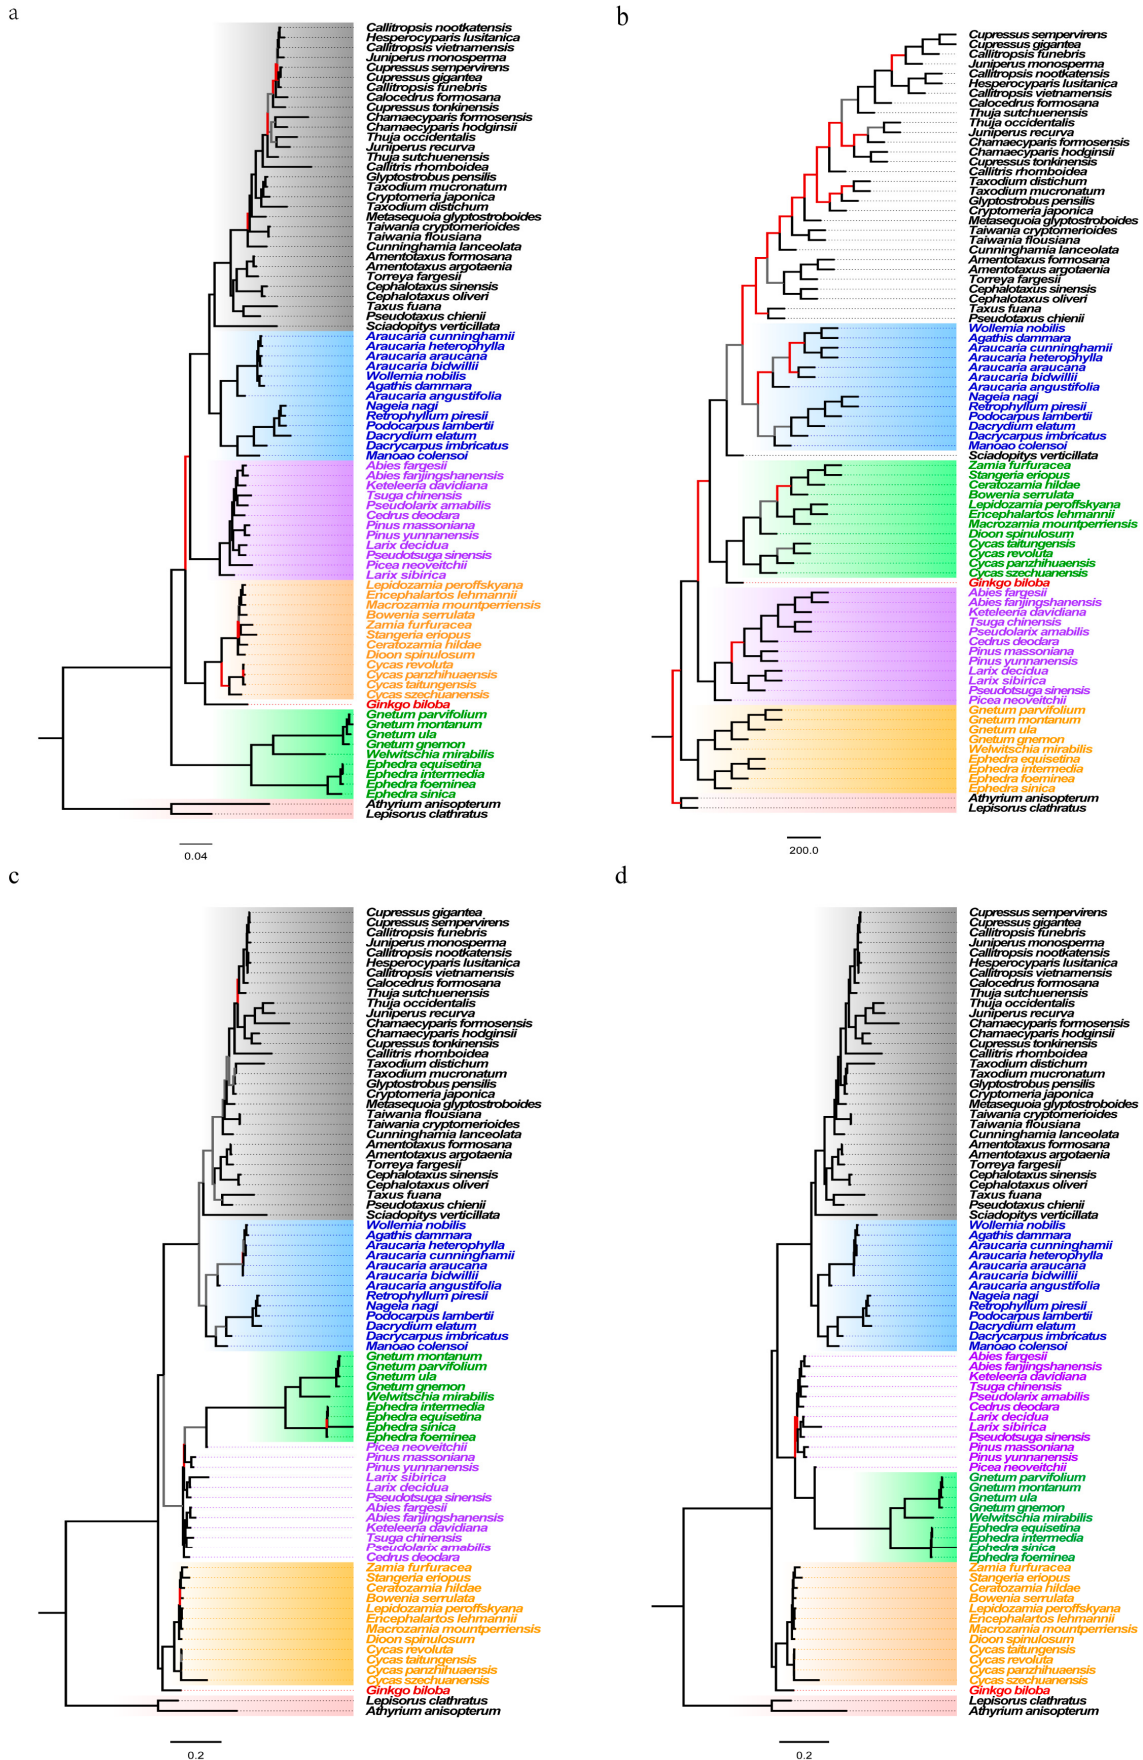

Supplement: s1 [file s1 › Figure S1.pdf]
